# Supplementary material
Source: ML conference proceedings conference paper supplement (https://openreview.net/forum?id=jNt9ql72mBg)

# agaricus-lepiota

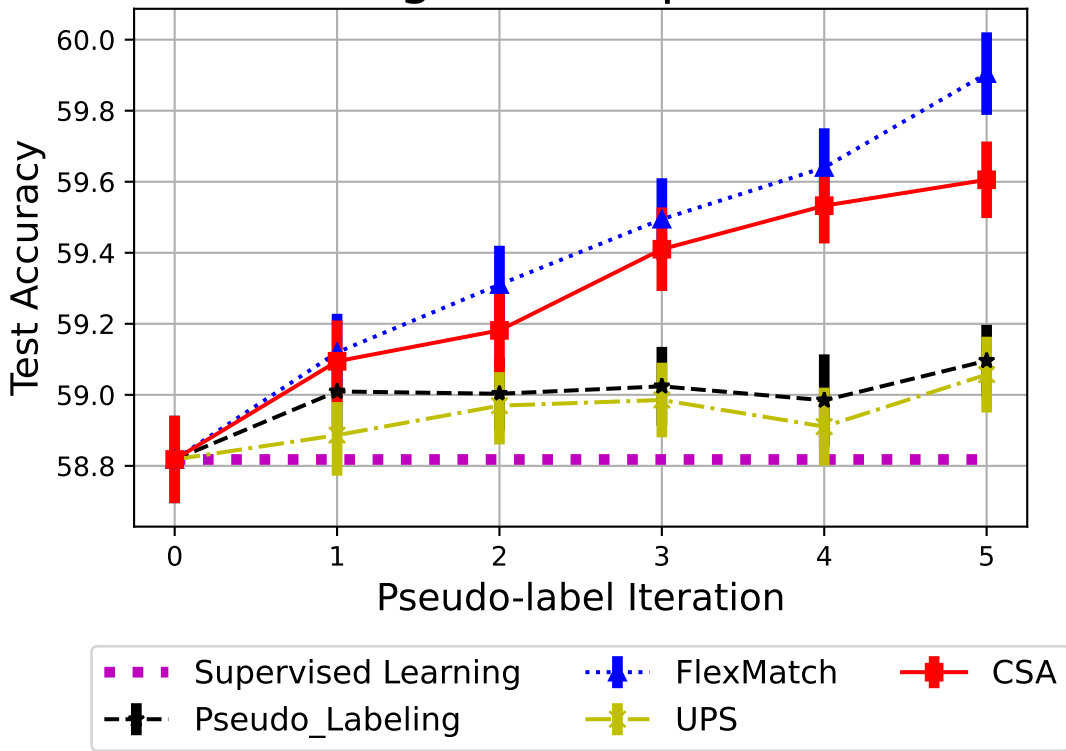

Supplement: supplementary_material [file attachment]

# emotions

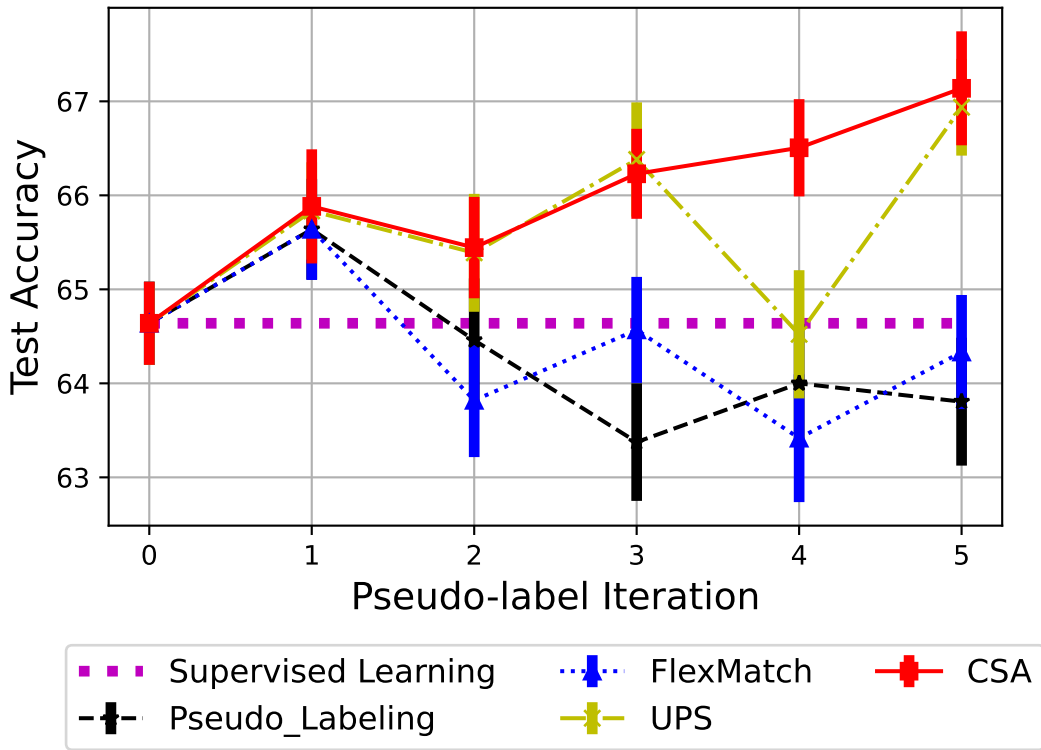

Supplement: supplementary_material [file attachment]

# analcata\_data\_authorship

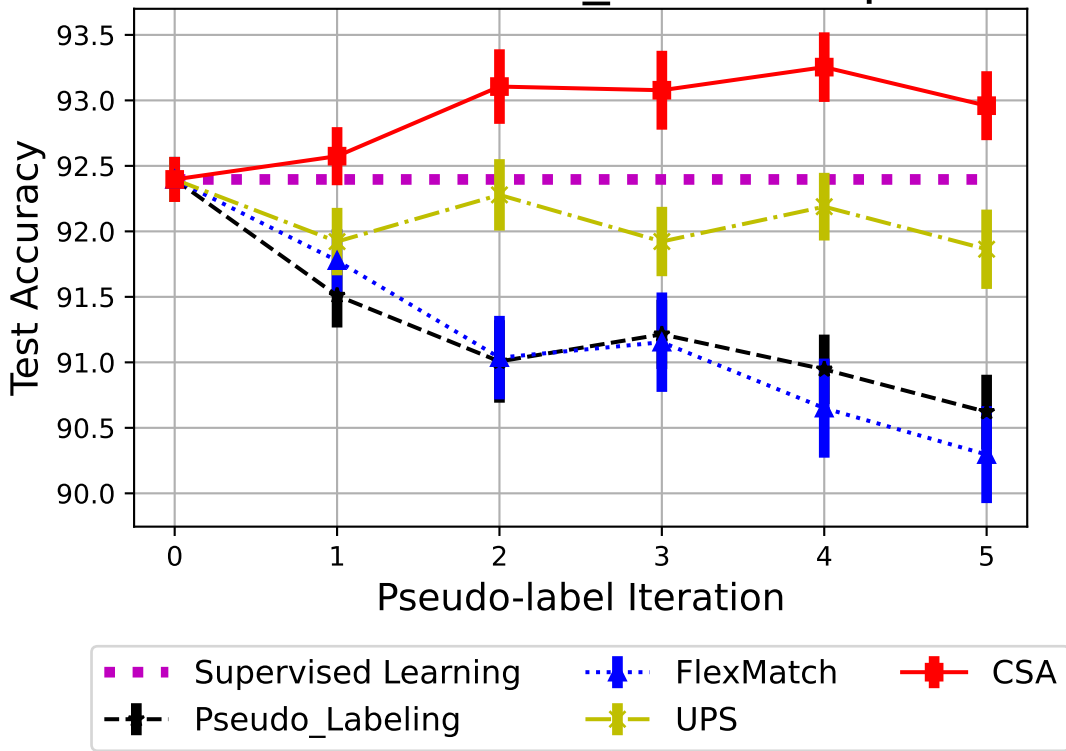

Supplement: supplementary_material [file attachment]

# German-credit

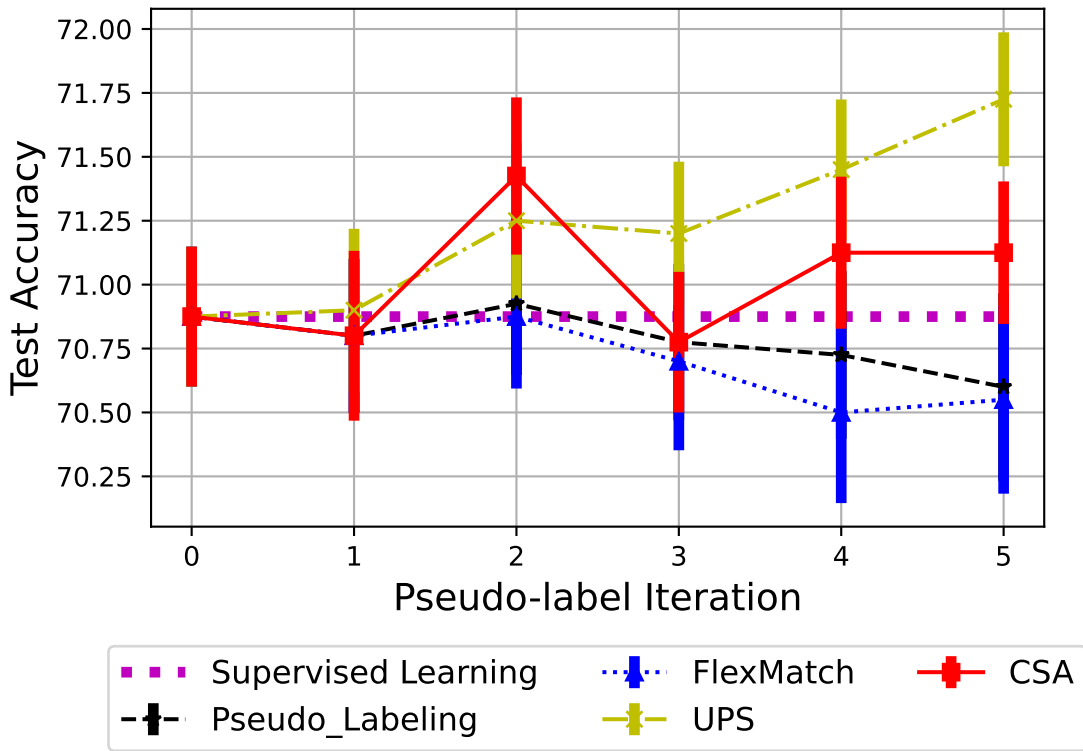

Supplement: supplementary_material [file attachment]

# madelon\_no

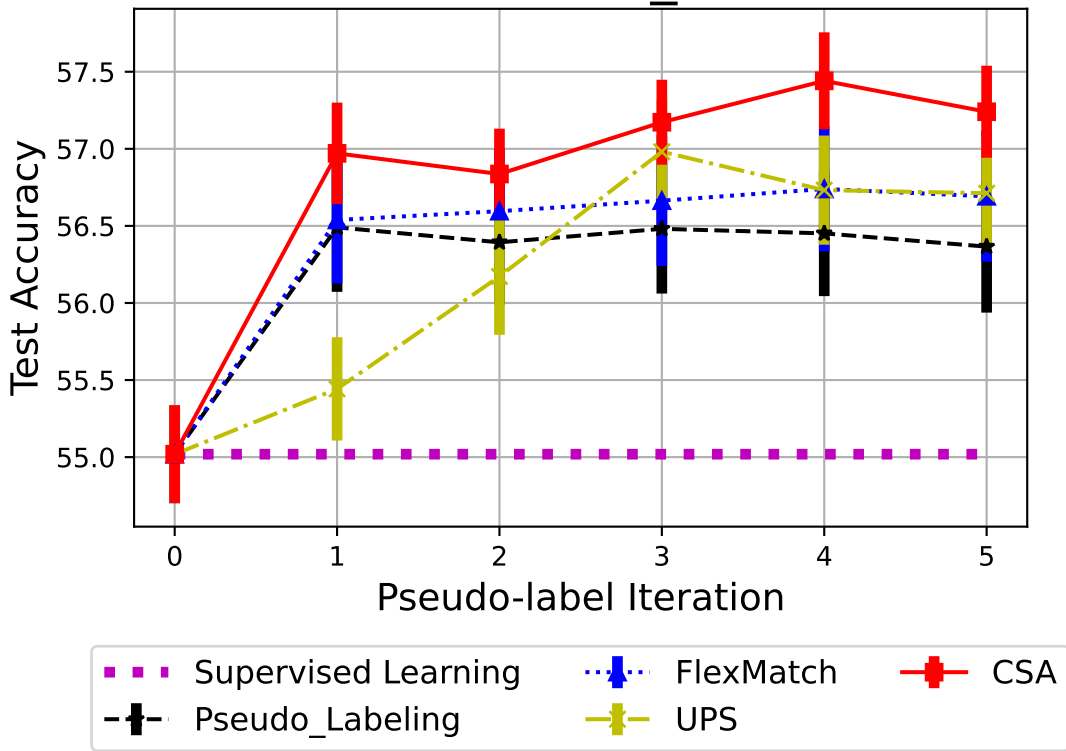

Supplement: supplementary_material [file attachment]

wdbc\_569\_31

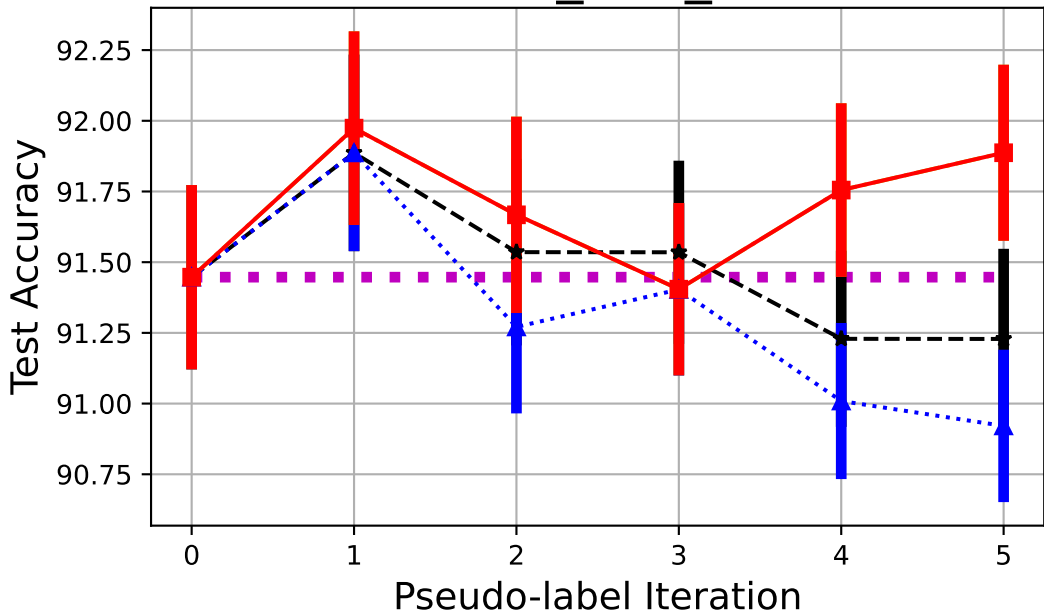

■ ■ ■ Supervised Learning

· · · ■ FlexMatch

— ■ — CSA

- + - Pseudo\_Labeling

— ■ — UPS

Supplement: supplementary_material [file attachment]

# breast\_cancer

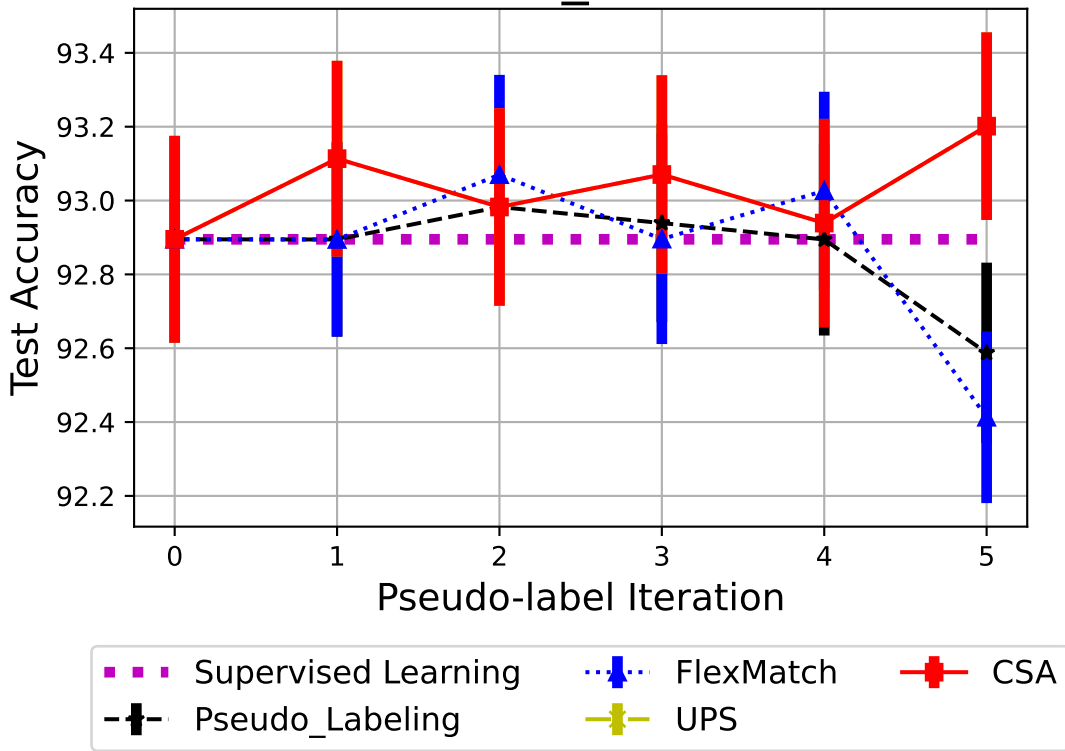

Supplement: supplementary_material [file attachment]

# synthetic\_control\_6c

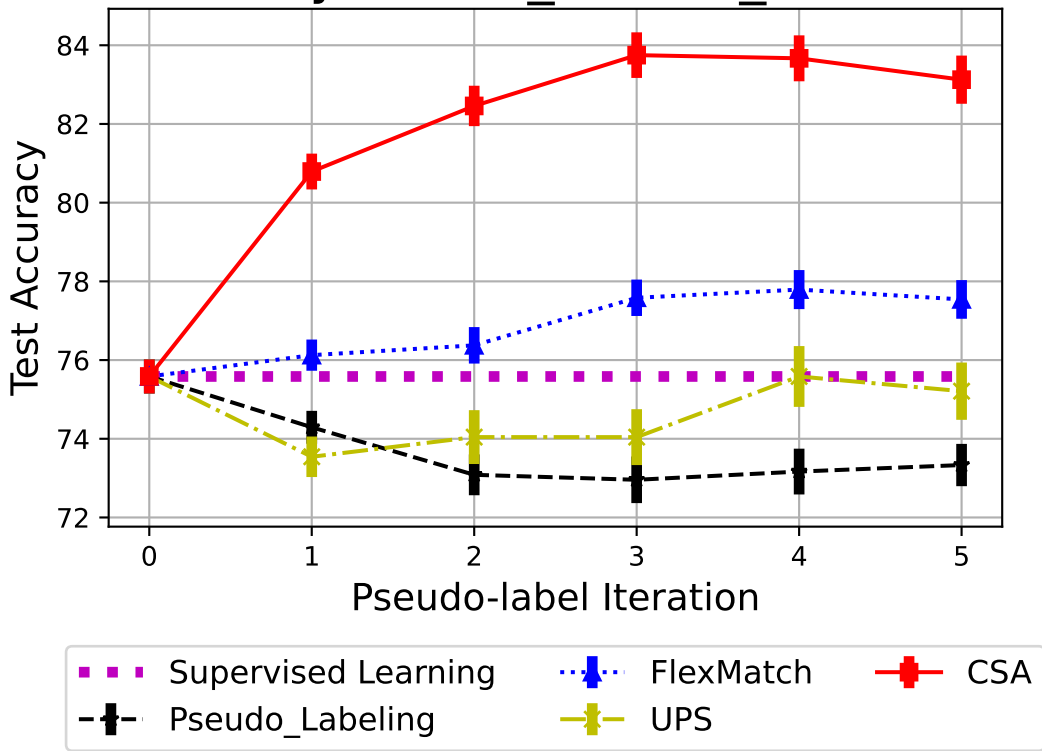

Supplement: supplementary_material [file attachment]

# digits

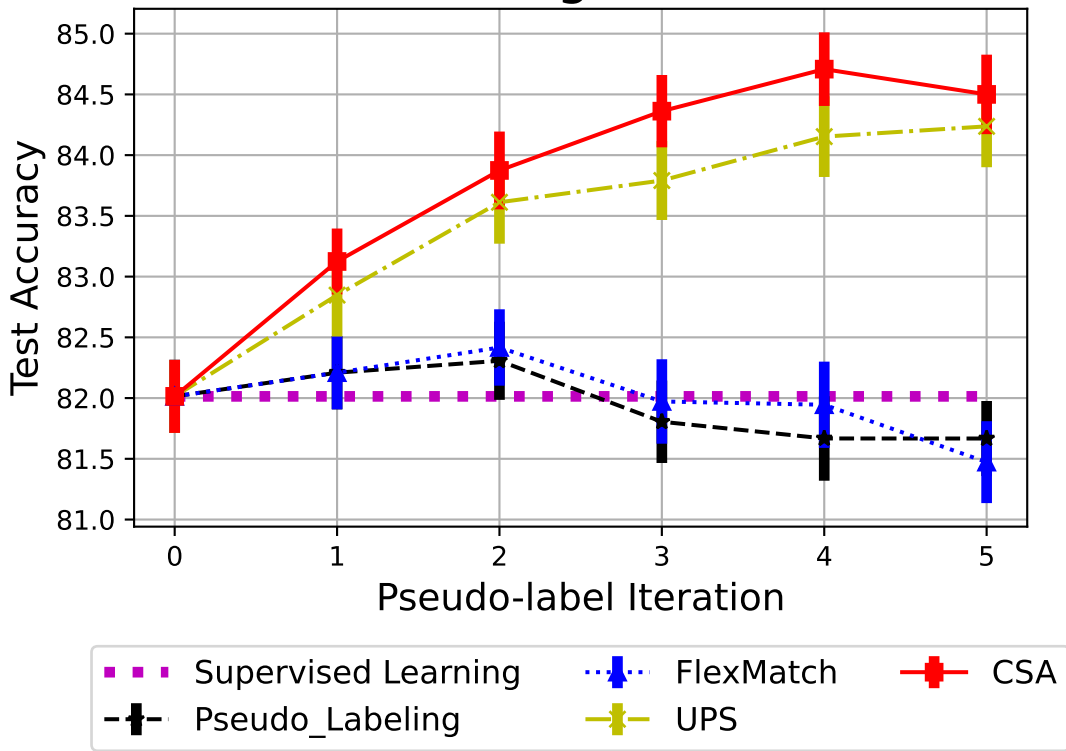

Supplement: supplementary_material [file attachment]

# segment\_2310\_20

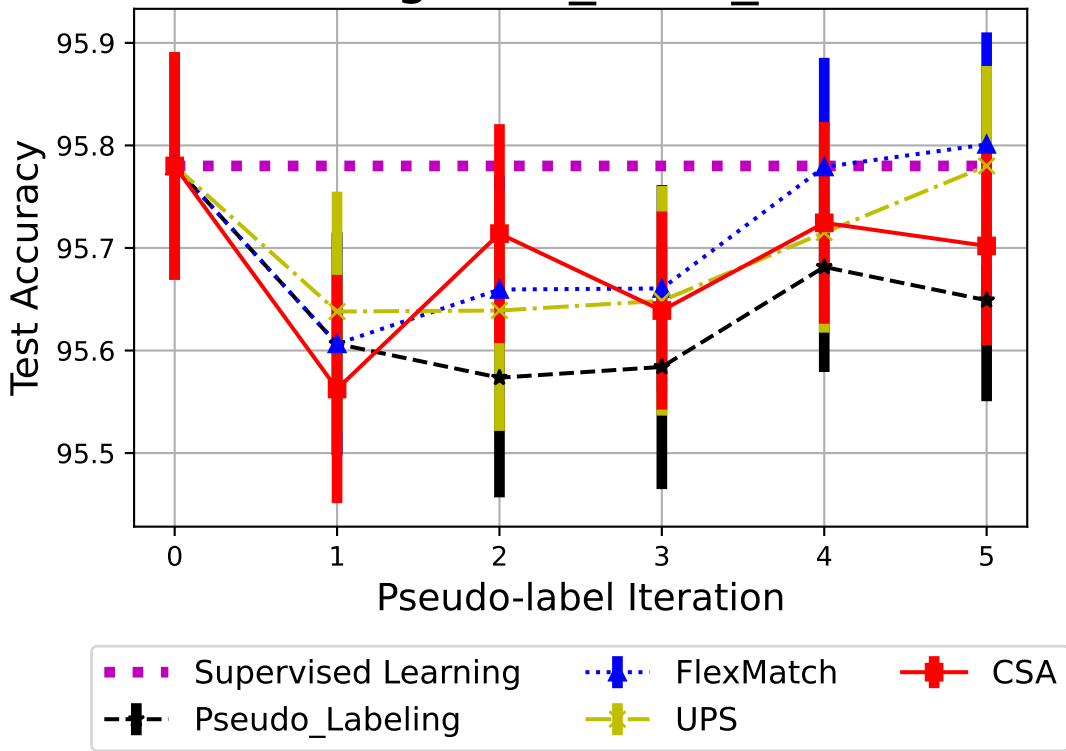

Supplement: supplementary_material [file attachment]
